# Supplementary material for: A PLGA nanofiber microfluidic device for highly efficient isolation and release of different phenotypic circulating tumor cells based on dual aptamers
Source: Royal Society of Chemistry journal article supplement (doi:10.1039/d0tb02988b), 2021-01-01
Supplement: d0tb02988b1.pdf [file d0tb02988b1.pdf]

**Electronic Supplementary Information**

**PLGA nanofibers microfluidic device for highly efficient  
isolation and release of different phenotypic circulating  
tumor cells based on the dual aptamers**

Zeen Wu,<sup>ab</sup> Yue Pan,<sup>ab</sup> Zhili Wang,<sup>\*b</sup> Pi Ding,<sup>b</sup> Tian Gao,<sup>b</sup> Qing Li,<sup>a</sup> Mingchao Hu,<sup>b</sup>  
Weipei Zhu<sup>\*a</sup> and Renjun Pei<sup>\*b</sup>

<sup>a</sup>Department of Gynecology and Obstetrics, The Second Affiliated Hospital of  
Soochow University, Suzhou, 215004, China

<sup>b</sup>CAS Key Laboratory for Nano-Bio Interface, Suzhou Institute of Nano-Tech and  
Nano-Bionics, Chinese Academy of Sciences, Suzhou, 215123, China

\*Corresponding Authors:

E-mail: zlwang2013@sinano.ac.cn; zwf333xx@126.com; rjpei2011@sinano.ac.cn.

Tel: 86-512-62872776.

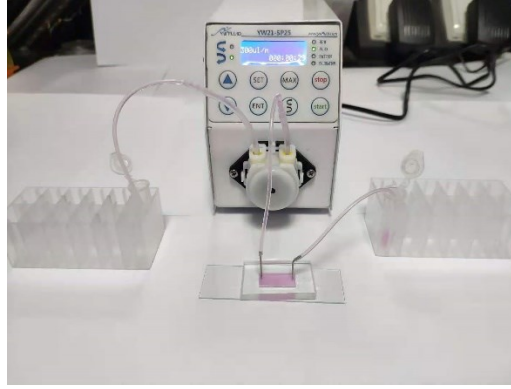

**Fig. S1** The photograph of PLGA nanofibers-based microfluidic devices used for capturing cells with the help of peristaltic pump.

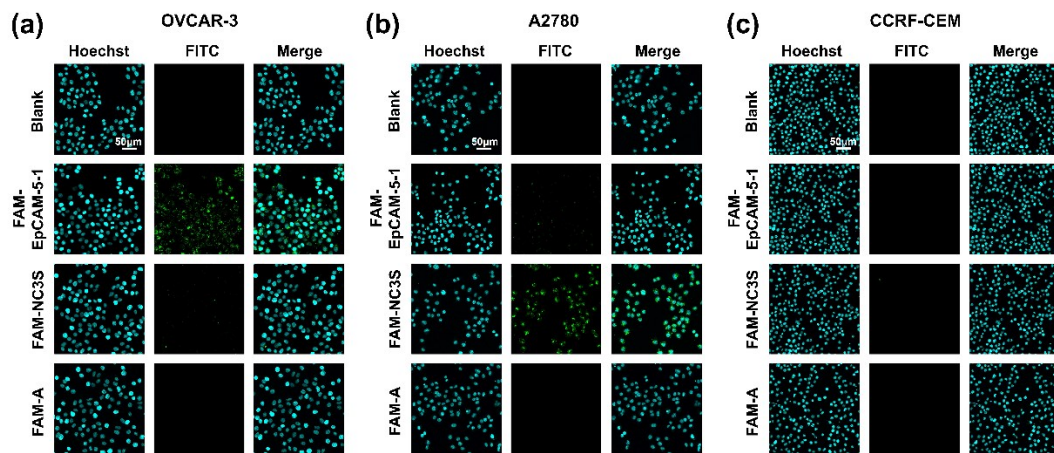

**Fig. S2** Fluorescent images of OVCAR-3 (a), A2780 (b), and CCRF-CEM (c) cells incubated with FAM-modified EpCAM-5-1, NC3S, and 16A, respectively.

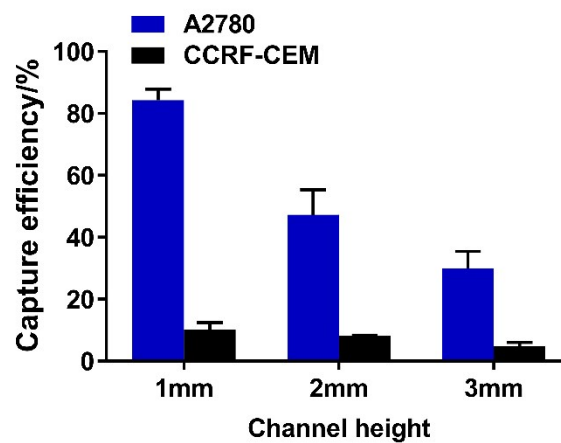

**Fig. S3** The capture efficiencies of A2780 and CCRF-CEM cells using NC3S aptamer-modified PLGA nanofibers-based microfluidic devices with different channel height (the height of liquid flow).

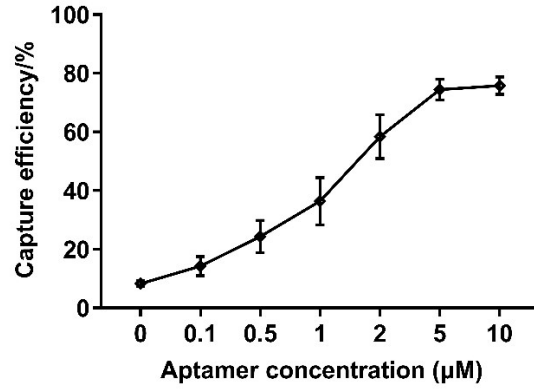

**Fig. S4** The capture efficiencies of OVCAR-3 cells using EpCAM-5-1 aptamer-modified PLGA nanofibers-based microfluidic device at various aptamer concentrations.

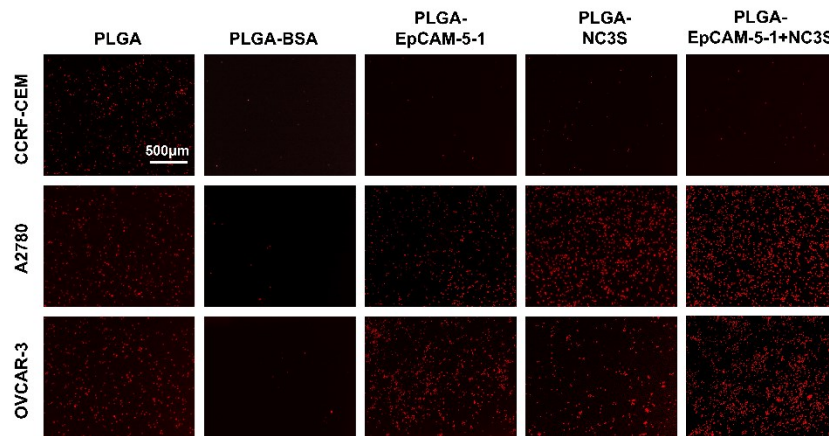

**Fig. S5** The fluorescence images of three kinds of cancer cells captured on different modified PLGA nanofibers-based microfluidic devices. The capture efficiencies were shown in Fig. 4.

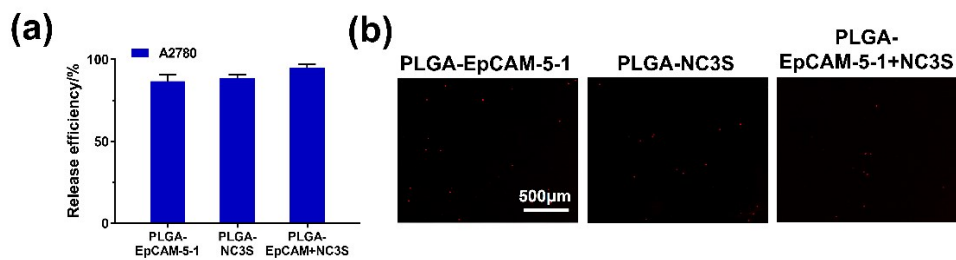

**Fig. S6** (a) The release efficiency of captured A2780 cells on the EpCAM-5-1, NC3S, and dual aptamers-modified PLGA nanofibers-based microfluidic devices after adding corresponding aptamer complementary sequences. (b) A group of representative fluorescence microscope images of A2780 cells after releasing on the EpCAM-5-1, PLGA-NC3S, and PLGA-EpCAM-5-1+NC3S devices.

NC3S, and dual aptamers-modified PLGA nanofibers-based microfluidic devices. A2780 cells were pre-stained by DiI dye (red).

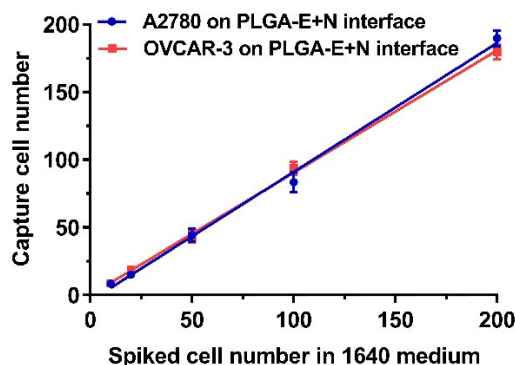

**Fig. S7** The capture situation of spiked A2780 and OVCAR-3 cells on dual aptamers-modified PLGA nanofibers-based microfluidic devices in 1640 medium. PLGA-E+N: The PLGA nanofibers microfluidic device modified with aptamer EpCAM-5-1 and NC3S.

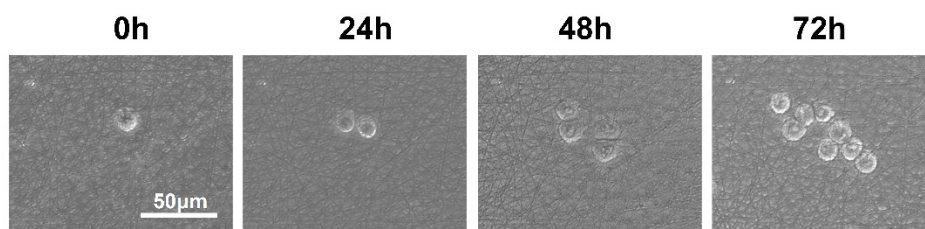

**Fig. S8** In situ culture of a single captured A2780 cell on the dual aptamers-modified PLGA nanofibers-based microfluidic devices in DMEM medium with the supplement of 10% FBS and 1% penicillin-streptomycin at 37 °C.

**Table S1** The basic and clinicopathological information of healthy volunteers and ovarian cancer patients.

| Sample No. | Age | Gender | Histological types | FIGO stage | Surgery | Volume of blood (mL) | Number of CTCs |
|------------|-----|--------|--------------------|------------|---------|----------------------|----------------|
| H1         | 25  | Female | N/A                | N/A        | N/A     | 3                    | 0              |
| H2         | 33  | Female | N/A                | N/A        | N/A     | 3                    | 0              |
| H3         | 54  | Female | N/A                | N/A        | N/A     | 3                    | 0              |
| H4         | 27  | Female | N/A                | N/A        | N/A     | 3                    | 0              |
| H5         | 32  | Female | N/A                | N/A        | N/A     | 3                    | 0              |
| H6         | 35  | Female | N/A                | N/A        | N/A     | 3                    | 0              |
| H7         | 21  | Female | N/A                | N/A        | N/A     | 3                    | 0              |

|     |    |        |                                  |      |     |   |    |
|-----|----|--------|----------------------------------|------|-----|---|----|
| OC1 | 41 | Female | Ovarian<br>serous<br>carcinoma   | IIIC | Yes | 3 | 6  |
| OC2 | 54 | Female | Ovarian<br>serous<br>carcinoma   | IIC  | Yes | 3 | 2  |
| OC3 | 60 | Female | Ovarian<br>serous<br>carcinoma   | IIIC | Yes | 3 | 9  |
| OC4 | 58 | Female | Ovarian<br>serous<br>carcinoma   | IV   | Yes | 3 | 13 |
| OC5 | 50 | Female | Ovarian<br>serous<br>carcinoma   | IIIB | Yes | 3 | 5  |
| OC6 | 74 | Female | Ovarian<br>mucinous<br>carcinoma | IIIC | Yes | 3 | 8  |
| OC7 | 38 | Female | Ovarian<br>mucinous<br>carcinoma | IC   | Yes | 3 | 1  |
